# Supplementary material for: Dynamics of polyzwitterions in salt-free and salt solutions
Source: Royal Society of Chemistry journal article supplement (doi:10.1039/c5cp04827c), 2015-01-01
Supplement: c5cp04827c1.pdf [file c5cp04827c1.pdf]

Electronic Supplementary Information

## Dynamics of Polyzwitterion in Salt-free and Salt Solutions

Zhonglin Cao<sup>a</sup> and Guangzhao Zhang<sup>\*ab</sup>

<sup>a</sup> Hefei National Laboratory for Physical Sciences at the Microscale, Department of Chemical Physics, University of Science and Technology of China, Hefei, China 230026

<sup>b</sup> Faculty of Materials Science and Engineering, South China University of Technology, Guangzhou, China, 510640

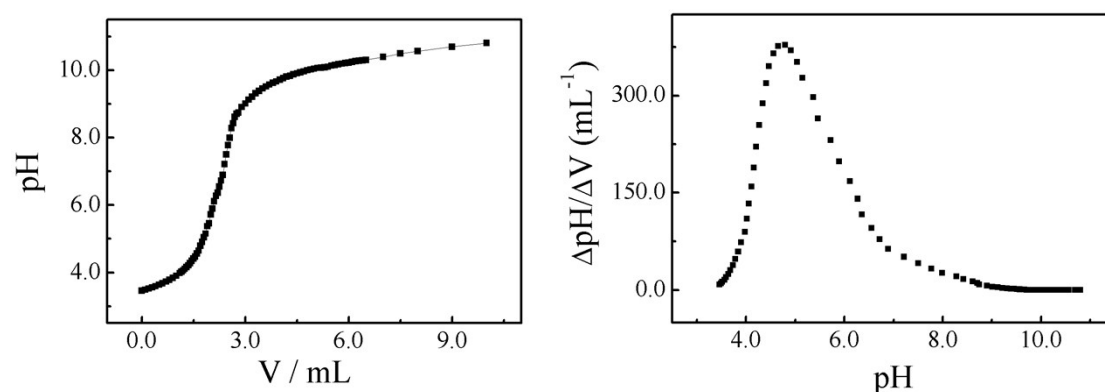

**Fig. S1.** Titration curve (left) and derivate curve (right) of PSB solution with 0.01 M NaOH, where  $C_p = 5.0$  g/L.

The isoelectric point (PI) of polyzwitterion arises from the asymmetric adsorption effect of anion and cation groups to  $\text{H}^+$  and  $\text{OH}^-$ . pI of PSB is 4.8 measured by titration.

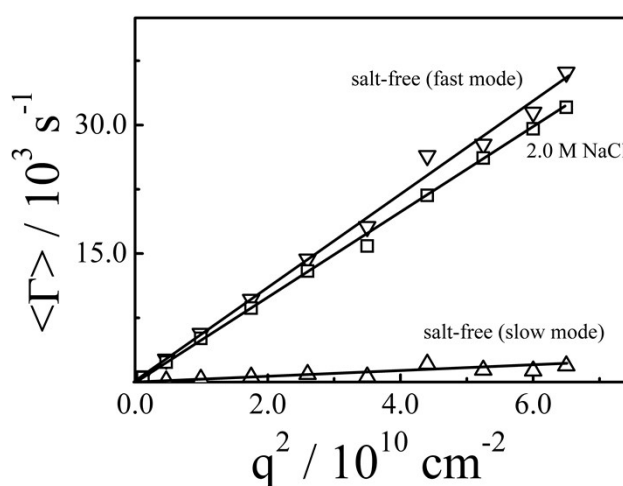

**Fig. S2.** Scattering vector ( $q$ ) dependence of average characteristic line width ( $\Gamma$ ) of PSB in salt-free solution and 2.0 M NaCl solution, where  $C_p = 0.02$  g/L.
